# Supplementary figures and images for: Mitosis-associated repression in development
Source: PubMed Central journal article supplement — Genes Dev. 2016 Jul 1;30(13):1503–8. doi: 10.1101/gad.281188.116 (PMC4949323; doi:10.1101/gad.281188.116), 2016-07-01

# Esposito\_Supplemental FigS1

A

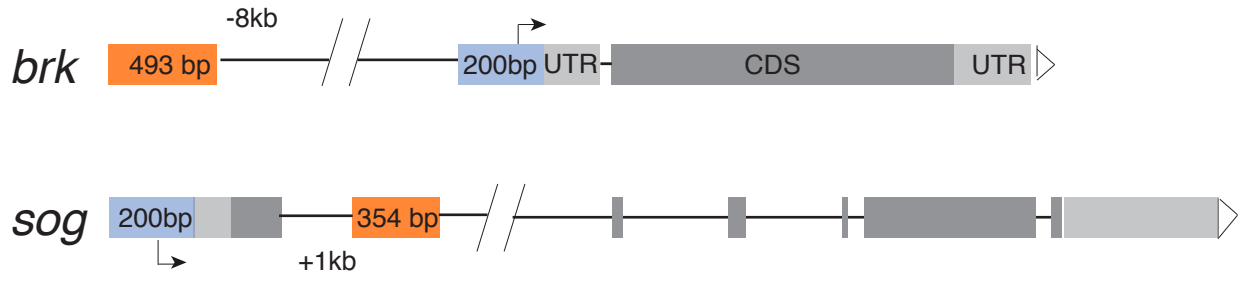

B

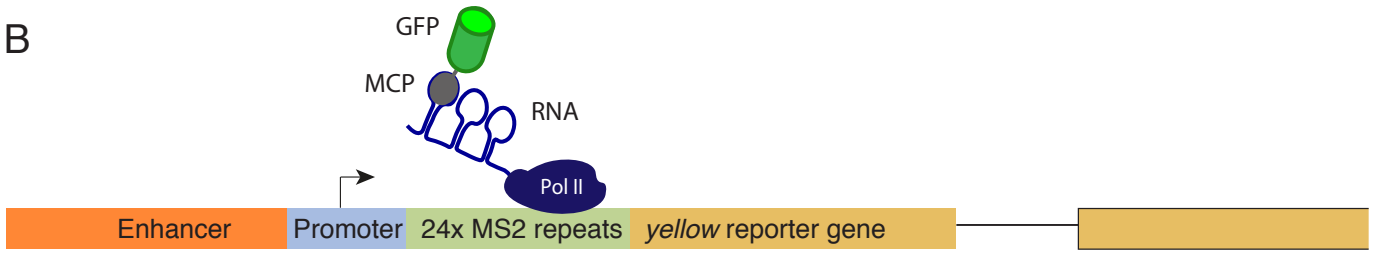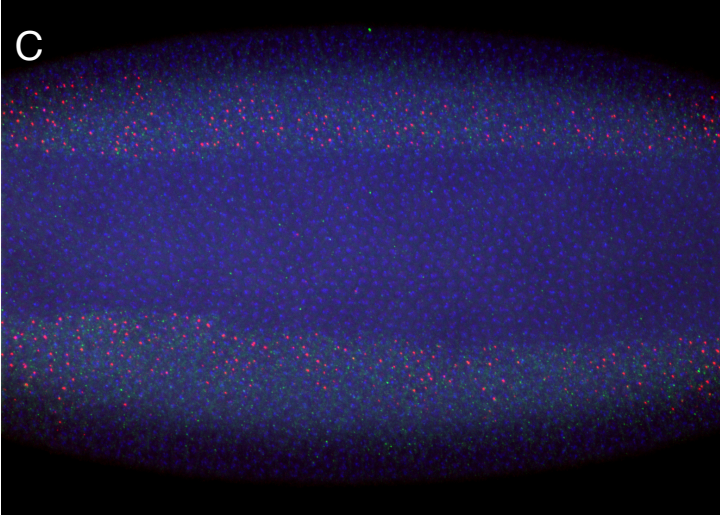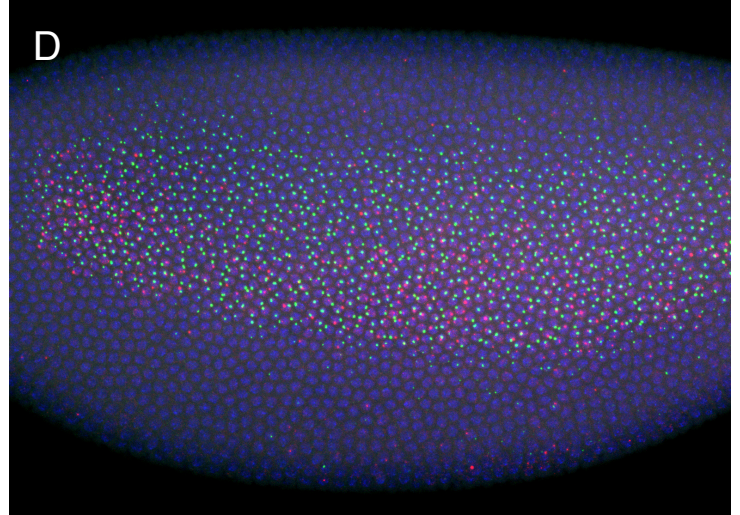

Supplement: supp_30.13.1503_SupplementalFigS1.pdf [file supp_30.13.1503_SupplementalFigS1.pdf]

# Esposito\_Supplemental FigS2

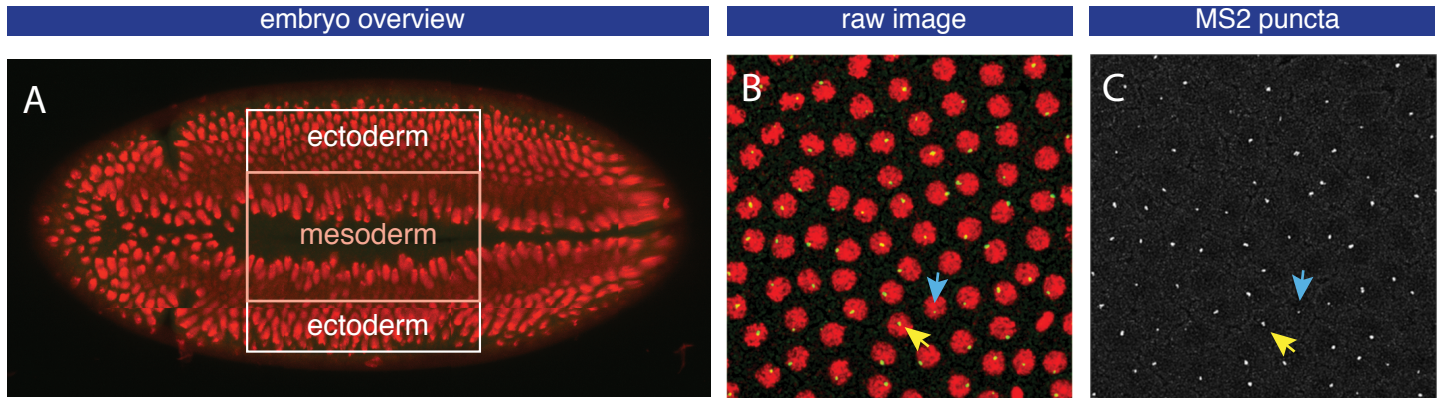

Supplement: supp_30.13.1503_SupplementalFigS2.pdf [file supp_30.13.1503_SupplementalFigS2.pdf]

# Esposito\_Supplemental FigS3

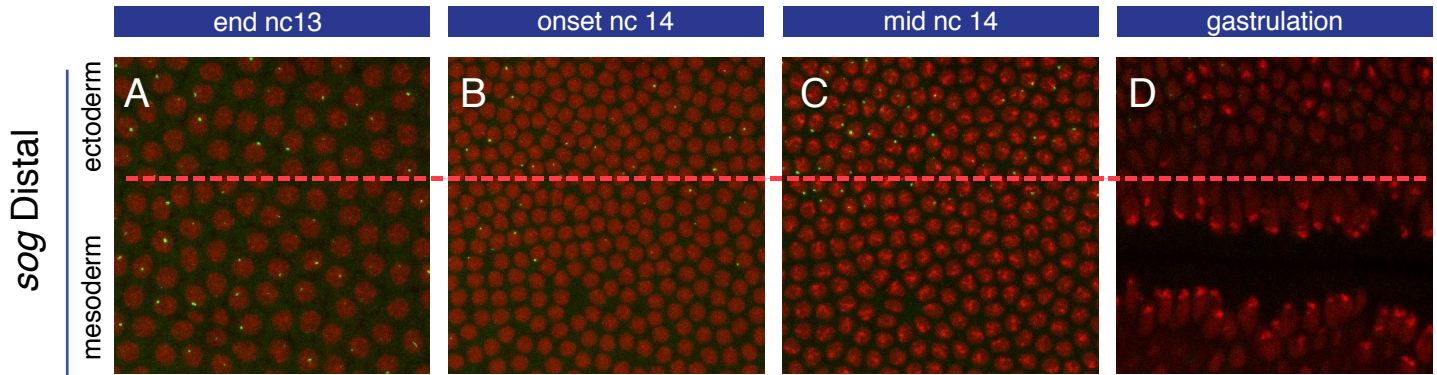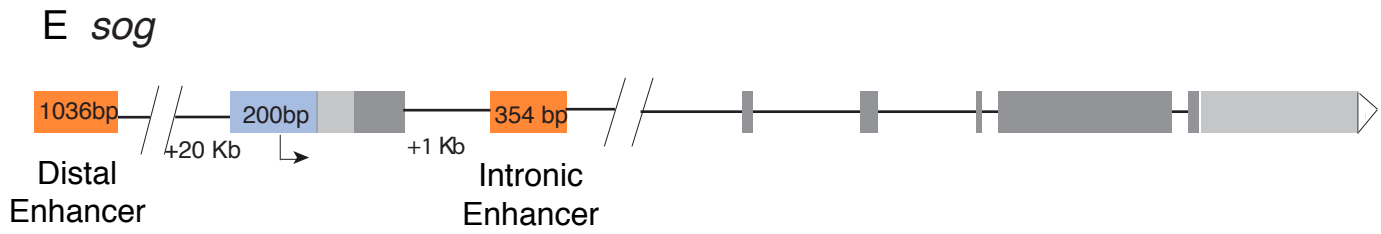

Supplement: supp_30.13.1503_SupplementalFigS3.pdf [file supp_30.13.1503_SupplementalFigS3.pdf]

# Active allele  
/nucleus

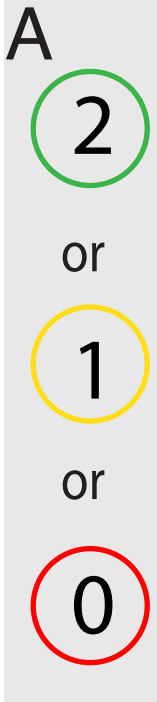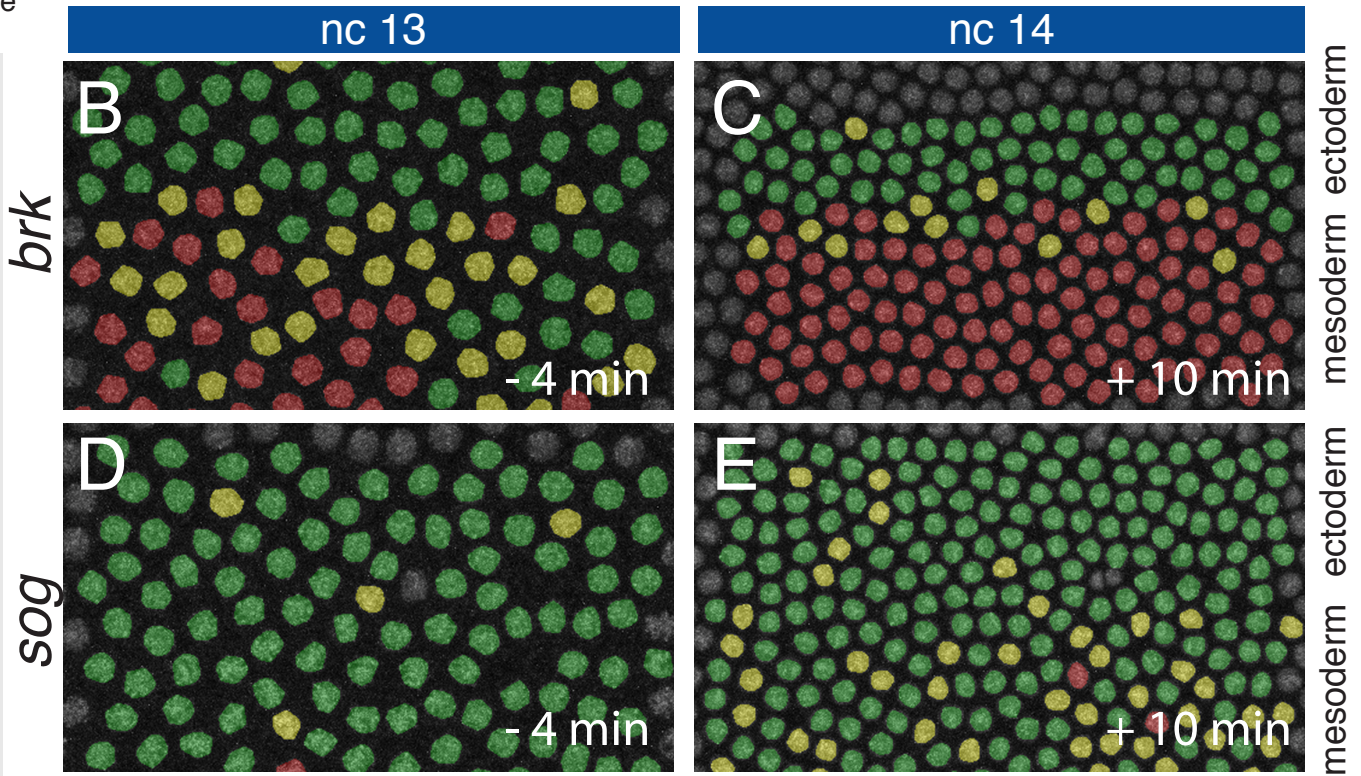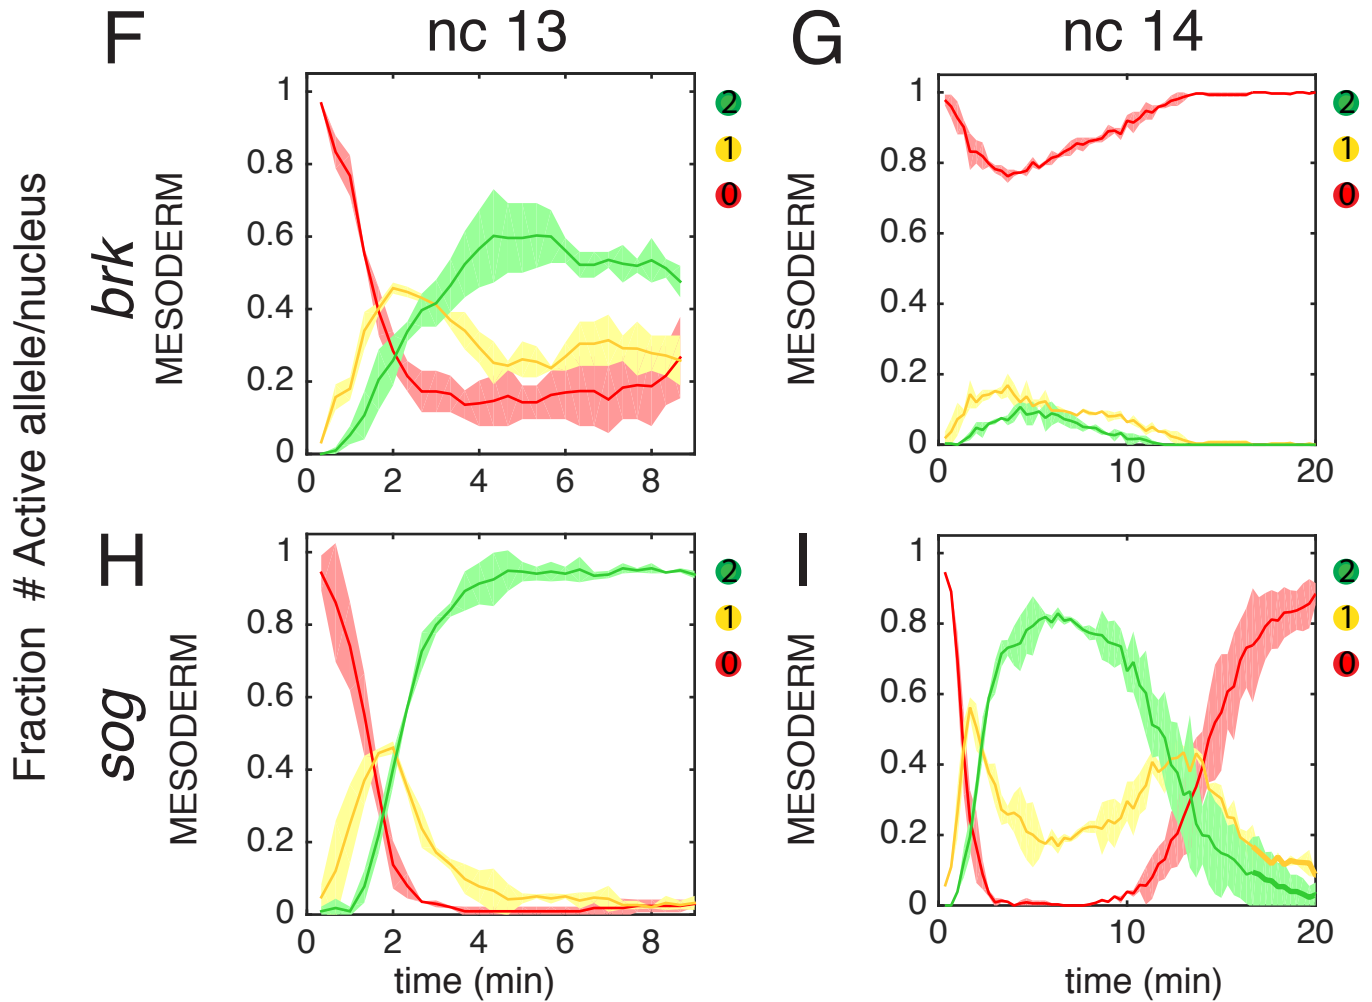

Supplement: supp_30.13.1503_SupplementalFigS4.pdf [file supp_30.13.1503_SupplementalFigS4.pdf]

# Esposito\_Supplemental FigS5

*brk*>MS2

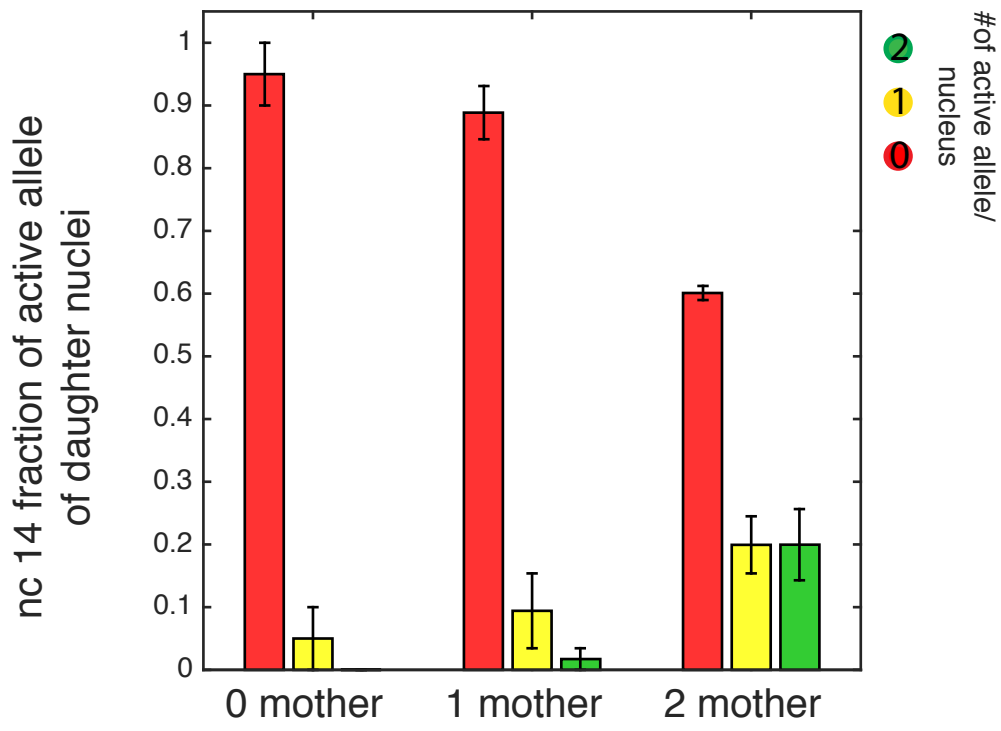

Supplement: supp_30.13.1503_SupplementalFigS5.pdf [file supp_30.13.1503_SupplementalFigS5.pdf]

*sog*  
ECTODERM

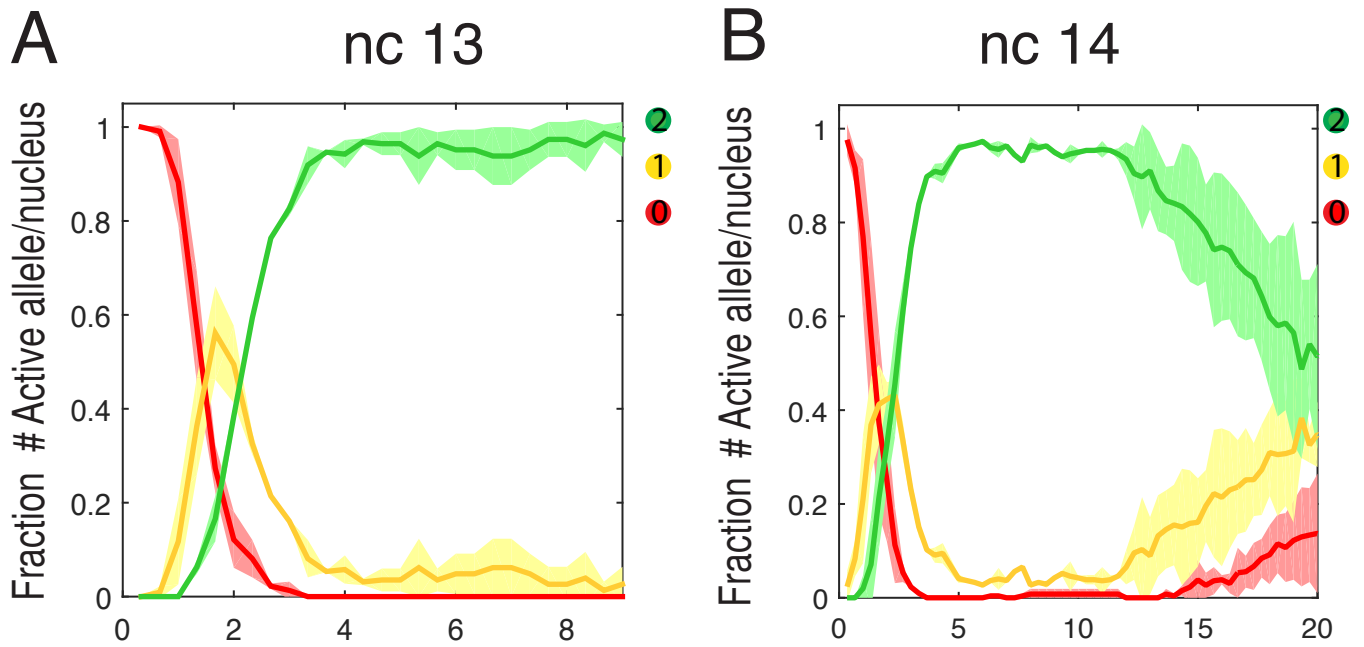

Supplement: supp_30.13.1503_SupplementalFigS6.pdf [file supp_30.13.1503_SupplementalFigS6.pdf]

# Esposito\_Supplemental FigS8

*brk* > MS2

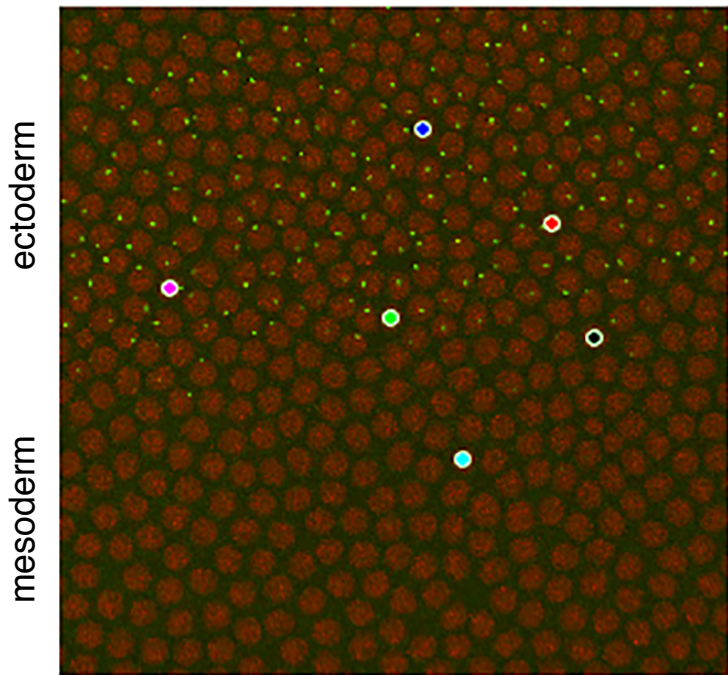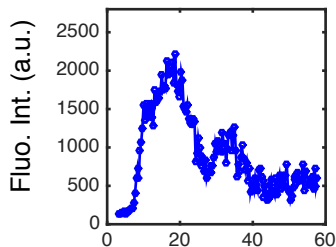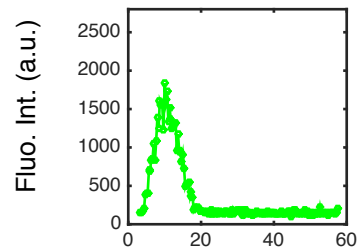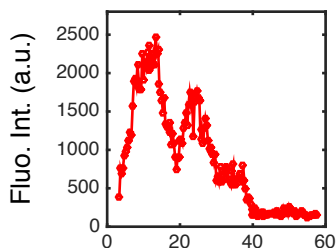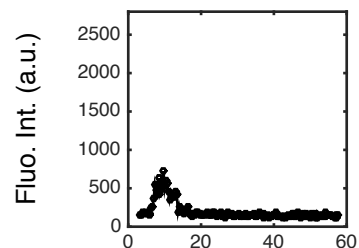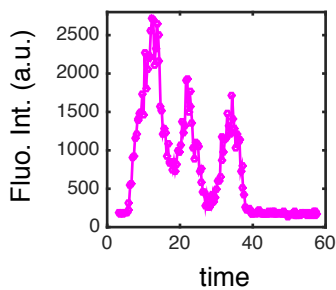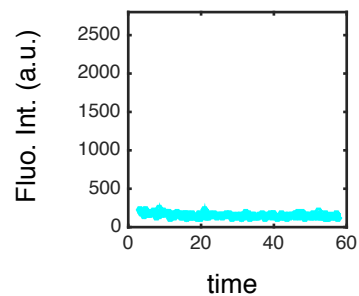

Supplement: supp_30.13.1503_Supplemental_FigS8.pdf [file supp_30.13.1503_Supplemental_FigS8.pdf]
